# Supplementary material for: Challenges in using CellTracker Green on foraminifers that host algal endosymbionts
Source: PeerJ. 2018 Aug 30;6:e5304. doi: 10.7717/peerj.5304 (PMC6119597; doi:10.7717/peerj.5304)
Supplement: Supplemental Information 1 [file peerj-06-5304-s001.xlsx]

## Sheet: Raw data
Control									DI Water (Dead)									1.5% Propylene Glycol									3% Propylene Glycol									10% Propylene Glycol
Well	PhotoID	L/D	Fluorescence- Y/N?	Presence/absence	Average FL/treatment				Well	PhotoID	L/D	Presence/absence	Average FL/treatment					Well	PhotoID	L/D	Fluorescence- Y/N?	Presence/absence	Average FL/treatment				Well	PhotoID	L/D	Fluorescence- Y/N?	Presence/absence	Average FL/treatment				Well	PhotoID	L/D	Fluorescence- Y/N?	Presence/absence	Average FL/treatment
A1	1	L	y	1					A1	1	D	y	1					A1	1	L	y	1					A1	1	D	y	1					A1	1	D	y	1
	2	L	y	1						2	D	y	1						2	L	y	1						2	D	y	1						2	D	y	1
	3	L	y	1						3	D	n	0						3	L	y	1						3	D	y	1						3	D	y	1
	4	L	y	1						4	D	y	1						4	L	y	1						4	D	y	1						4	D	y	1
	5	D	y	1	100					5	D	y	1	80					5	L	y	1	100					5	D	y	1	100					5	D	y	1	100
A2	1	L	y	1					A2	1	D	y	1					A2	1	L	n	0					A2	1	D	y	1					A2	1	D	y	1
	2	L	y	1						2	D	y	1						2	L	y	1						2	D	n	0						2	D	y	1
	3	L	y	1						3	D	y	1						3	L	y	1						3	D	n	0						3	D	y	1
	4	L	y	1						4	D	n	0						4	D	y	1						4	D	y	1						4	D	y	1
	5	L	y	1	100					5	D	y	1	80					5	D	y	1	80					5	D	y	1	60					5	D	y	1	100
A3	1	L	y	1					A3	1	D	n	0					A3	1	L	y	1					A3	1	D	n	0					A3	1	D	y	1
	2	L	y	1						2	D	n	0						2	L	y	1						2	D	n	0						2	D	y	1
	3	L	y	1						3	D	n	0						3	L	y	1						3	D	y	1						3	D	n	0
	4	L	y	1						4	D	n	0						4	L	y	1						4	D	y	1						4	D	y	1
	5	L	y	1	100					5	D	y	1	20					5	L	y	1	100					5	D	n	0	40					5	D	y	1	80
A4	1	L	y	1					A4	1	D	n	0					A4	1	L	y	1					A4	1	D	y	1					A4	1	D	y	1
	2	L	y	1						2	D	n	0						2	L	y	1						2	D	n	0						2	D	y	1
	3	L	y	1						3	D	n	0						3	L	y	1						3	D	y	1						3	D	y	1
	4	L	n	0						4	D	n	0						4	L	y	1						4	LOST								4	D	y	1
	5	D	y	1	80					5	D	n	0	0					5	D	y	1	100					5	LOST			66.6667					5	D	y	1	100
B1	1	L?	y	1					B1	1	D	n	0					B1	1	L	y	1					B1	1	D	y	1					B1	1	D	y	1
	2	L	y	1						2	D	n	0						2	L	y	1						2	D	y	1						2	D	y	1
	3	L	y	1						3	D	y	1						3	L	y	1						3	D	n	0						3	D	y	1
	4	L	y	1						4	D	y	1						4	L	y	1						4	D	y	1						4	D	y	1
	5	L	y	1	100					5	D	n	0	40					5	LOST			100					5	D	y	1	80					5	LOST			100
Summary				24									11									23									16									23
Percentage				96									44									95.8333									69.5652									95.8333
St.Dev					8									32									8									20.0444									8

## Sheet: DI water (dead)
PhotoID (Well#Individual#)	Mortality (Dead=0; Live=1)	Fluorescence Brightness (0=absent; 1=dim; 2=medium; 3=bright)	Fluorescence coverage (0=absent; 1=isolated/spot fluorescence;2= slightly fluorescent; 3= fluorescent (>25%); 4=highly fluorescent (>75%)	Fluorescence coverage with 1s changed to 0s		Notes		Well Averages
A11	0	1	2	2				Well	Brightness	Coverage	Coverage with 1s changes to 0s
A12	0	2	2	2				A1	1	1.6	1.6
A13	0	0	0	0				A2	1.4	1.8	1.4
A14	0	1	2	2				A3	0.6	1.2	1
A15	0	1	2	2				A4	0.4	0.4	0
A21	0	1	1	0				B1	0.6	0.6	0.4
A22	0	1	3	3
A23	0	1	2	2
A24	0	3	1	0
A25	0	1	2	2
A31	0	0	0	0
A32	0	0	0	0
A33	0	1	3	3
A34	0	1	1	0
A35	0	1	2	2
A41	0	0	0	0
A42	0	0	0	0
A43	0	0	0	0
A44	0	1	1	0
A45	0	1	1	0
B11	0	0	0	0
B12	0	0	0	0
B13	0	1	1	0
B14	0	2	2	2
B15	0	0	0	0

## Sheet: Control
PhotoID (Well#Individual#)	Mortality (Dead=0; Live=1)	Fluorescence Brightness (0=absent; 1=dim; 2=medium; 3=bright)	Fluorescence coverage (0=absent; 1=isolated/spot fluorescence;2= slightly fluorescent; 3= fluorescent (>25%); 4=highly fluorescent (>75%)	Fluorescence coverage with 1s changed to 0s		Notes		Well Averages
A11	1	3	1	0				Well	Brightness	Coverage	Coverage with 1s changes to 0s
A12	1	2	2	2				A1	2.8	1.8	1.6
A13	1	3	2	2				A2	2.4	2.2	2.2
A14	1	3	2	2				A3	1.8	2	2
A15	0	3	2	2				A4	2.4	1.6	1.6
A21	1	3	2	2				B1	2.6	2.4	2.4
A22	1	2	2	2
A23	1	2	2	2
A24	1	3	3	3
A25	1	2	2	2
A31	1	2	2	2
A32	1	1	2	2
A33	1	2	2	2
A34	1	1	2	2
A35	1	3	2	2
A41	1	3	2	2
A42	1	3	2	2
A43	1	3	2	2
A44	1	0	0	0
A45	0	3	2	2
B11	1	2	2	2
B12	1	3	2	2
B13	1	2	2	2
B14	1	3	4	4
B15	1	3	2	2

## Sheet: 1.5%
PhotoID (Well#Individual#)	Mortality (Dead=0; Live=1)	Fluorescence Brightness (0=absent; 1=dim; 2=medium; 3=bright)	Fluorescence coverage (0=absent; 1=isolated/spot fluorescence;2= slightly fluorescent; 3= fluorescent (>25%); 4=highly fluorescent (>75%)	Fluorescence coverage with 1s changed to 0s		Notes		Well Averages
A11	1	3	1	0				Well	Brightness	Coverage	Coverage with 1s changes to 0s
A12	1	1	2	2				A1	2.4	1.8	1.6
A13	1	3	2	2				A2	2	2.2	2.2
A14	1	2	2	2				A3	1.8	2.2	2.2
A15	1	3	2	2				A4	2.4	1.6	1.6
A21	1	2	2	2				B1	2.6	2.4	2.2
A22	1	2	2	2
A23	1	2	2	2
A24	0	3	3	3
A25	0	1	2	2
A31	1	2	2	2
A32	1	1	3	3
A33	1	2	2	2
A34	1	1	2	2
A35	1	3	2	2
A41	1	3	2	2
A42	1	3	2	2
A43	1	3	2	2
A44	1	0	0	0
A45	0	3	2	2
B11	1	2	3	3
B12	1	3	1	0
B13	1	2	2	2
B14	1	3	4	4
B15	N/A	3	2	2

## Sheet: 3%
PhotoID (Well#Individual#)	Mortality (Dead=0; Live=1)	Fluorescence Brightness (0=absent; 1=dim; 2=medium; 3=bright)	Fluorescence coverage (0=absent; 1=isolated/spot fluorescence;2= slightly fluorescent; 3= fluorescent (>25%); 4=highly fluorescent (>75%)	Fluorescence coverage with 1s changed to 0s		Notes		Well Averages
A11	0	1	3	3				Well	Brightness	Coverage	Coverage with 1s changes to 0s
A12	0	1	2	2				A1	1.8	2	1.8
A13	0	3	1	0				A2	1.6	1.2	1.2
A14	0	1	2	2				A3	1.2	1.4	1.2
A15	0	3	2	2				A4	2	2.66667	2.66667
A21	0	2	2	2				B1	0.8	1.8	1.8
A22	0	0	0	0
A23	0	0	0	0
A24	0	3	2	2
A25	0	3	2	2
A31	0	0	0	0
A32	0	1	3	3
A33	0	3	1	0
A34	0	2	3	3
A35	0	0	0	0
A41	0	3	2	2
A42	0	1	3	3
A43	0	2	3	3
A44	n/a
A45	n/a
B11	0	1	2	2
B12	0	1	3	3
B13	0	0	0	0
B14	0	1	2	2
B15	0	1	2	2

## Sheet: 10%
PhotoID (Well#Individual#)	Mortality (Dead=0; Live=1)	Fluorescence Brightness (0=absent; 1=dim; 2=medium; 3=bright)	Fluorescence coverage (0=absent; 1=isolated/spot fluorescence;2= slightly fluorescent; 3= fluorescent (>25%); 4=highly fluorescent (>75%)	Fluorescence coverage with 1s changed to 0s		Notes		Well Averages
A11	0	3	2	2				Well	Brightness	Coverage	Coverage with 1s changes to 0s
A12	0	3	2	2				A1	2.8	2	2
A13	0	2	2	2				A2	3	2	2
A14	0	3	2	2				A3	2.4	1.6	1.6
A15	0	3	2	2				A4	3	2	2
A21	0	3	2	2				B1	2.75	2	2
A22	0	3	2	2
A23	0	3	2	2
A24	0	3	2	2
A25	0	3	2	2
A31	0	3	2	2
A32	0	3	2	2
A33	0	0	0	0
A34	0	3	2	2
A35	0	3	2	2
A41	0	3	2	2
A42	0	3	2	2
A43	0	3	2	2
A44	0	3	2	2
A45	0	3	2	2
B11	0	2	2	2
B12	0	3	2	2
B13	0	3	2	2
B14	0	3	2	2
B15	n/a

## Sheet: Brightness ave of ave
	Brightness (well averages)						Anova: Single Factor
	0	0.015	0.03	0.1
	2.8	2.4	1.8	2.8			SUMMARY
	2.4	2	1.6	3			Groups	Count	Sum	Average	Variance
	1.8	1.8	1.2	2.4			0	5	12	2.4	0.14
	2.4	2.4	2	3			0.015	5	11.2	2.24	0.108
	2.6	2.6	0.8	2.75			0.03	5	7.4	1.48	0.232
Mean:	2.4	2.24	1.48	2.79			0.1	5	13.95	2.79	0.0605
							ANOVA
							Source of Variation	SS	df	MS	F	P-value	F crit
							Between Groups	4.52538	3	1.50846	11.1634	0.000336257	3.23887
							Within Groups	2.162	16	0.135125
							Total	6.68738	19
							Tukey's:				Tukey's- Brightness
							DF:	16				0	0.015	0.03	0.1
							k:	4			0	-
							Tukey's Q:	4.33			0.015	0.16	-
							Sample Size of treatment:	5			0.03	0.92	0.76	-
							SQRT(MS/n)	0.164393			0.1	0.39	0.55	1.31	-
							HSD:	0.711821

## Sheet: coverage ave of ave
	Coverage (well averages)						Anova: Single Factor
	0	0.015	0.03	0.1
	1.6	1.6	1.8	2			SUMMARY
	2.2	2.2	1.2	2			Groups	Count	Sum	Average	Variance
	2	2.2	1.2	1.6			0	5	9.8	1.96	0.128
	1.6	1.6	2.66667	2			0.015	5	9.8	1.96	0.108
	2.4	2.2	1.8	2			0.03	5	8.66667	1.73333	0.362222
Mean	1.96	1.96	1.73333	1.92			0.1	5	9.6	1.92	0.032
							ANOVA
							Source of Variation	SS	df	MS	F	P-value	F crit
							Between Groups	0.176	3	0.0586667	0.372355	0.774058	3.23887
							Within Groups	2.52089	16	0.157556
							Total	2.69689	19

## Sheet: Brightness ANOVA and Tukey
Fluorescence Brightness
DIW	0	0.015	0.03	0.1			Anova: Single Factor
1	3	3	1	3
2	2	1	1	3			SUMMARY
0	3	3	3	2			Groups	Count	Sum	Average	Variance
1	3	2	1	3			DIW	25	20	0.8	0.583333
1	3	3	3	3			0	25	60	2.4	0.666667
1	3	2	2	3			0.015	25	56	2.24	0.773333
1	2	2	0	3			0.03	23	33	1.43478	1.25692
1	2	2	0	3			0.1	24	67	2.79167	0.432971
3	3	3	3	3
1	2	1	3	3
0	2	2	0	3			ANOVA
0	1	1	1	3			Source of Variation	SS	df	MS	F	P-value	F crit
1	2	2	3	0			Between Groups	63.3049	4	15.8262	21.4884	2.61432e-13	2.4492
1	1	1	2	3			Within Groups	86.1705	117	0.7365
1	3	3	0	3
0	3	3	3	3			Total	149.475	121
0	3	3	1	3
0	3	3	2	3
1	0	0	1	3
1	3	3	1	3
0	2	2	0	2
0	3	3	1	3
1	2	2	1	3
2	3	3		3
0	3	3
	Fluorescence Brightness-Median Added						Anova: Single Factor
	DIW	0	0.015	0.03	0.1
	1	3	3	1	3		SUMMARY
	2	2	1	1	3		Groups	Count	Sum	Average	Variance
	0	3	3	3	2		DIW	25	20	0.8	0.583333
	1	3	2	1	3		0	25	60	2.4	0.666667
	1	3	3	3	3		0.015	25	56	2.24	0.773333
	1	3	2	2	3		0.03	25	35	1.4	1.16667
	1	2	2	0	3		0.1	25	70	2.8	0.416667
	1	2	2	0	3
	3	3	3	3	3
	1	2	1	3	3		ANOVA
	0	2	2	0	3		Source of Variation	SS	df	MS	F	P-value	F crit
	0	1	1	1	3		Between Groups	65.792	4	16.448	22.8022	4.98962e-14	2.44724
	1	2	2	3	0		Within Groups	86.56	120	0.721333
	1	1	1	2	3
	1	3	3	0	3		Total	152.352	124
	0	3	3	3	3
	0	3	3	1	3
	0	3	3	2	3		Mean Square Error:					DIW	0	0.015	0.03	0.1
	1	0	0	1	3		0.849313				DIW	-
	1	3	3	1	3		D.F:				0	1.6	-
	0	2	2	0	2		120				0.015	1.44	0.16	-
	0	3	3	1	3		Tukey's Q:				0.03	0.6	1	0.84	-
	1	2	2	1	3		3.92				0.1	2	0.4	0.56	1.4	-
	2	3	3	1	3		MSE/N(treatment)
	0	3	3	1	3		0.0339725
Mean	0.8	2.4	2.24	1.4	2.8		SQRT(MSE/N)
St.Dev.	0.748331	0.8	0.861626	1.0583	0.632456		0.184316
							Tukey's Yardstick (Q*SQRT(MSE/N)
							0.72252
Excluding DI water treatment
	0	0.015	0.03	0.1			Anova: Single Factor
	3	3	1	3
	2	1	1	3			SUMMARY
	3	3	3	2			Groups	Count	Sum	Average	Variance
	3	2	1	3			0	25	60	2.4	0.666667
	3	3	3	3			0.015	25	56	2.24	0.773333
	3	2	2	3			0.03	25	35	1.4	1.16667
	2	2	0	3			0.1	25	70	2.8	0.416667
	2	2	0	3
	3	3	3	3
	2	1	3	3			ANOVA
	2	2	0	3			Source of Variation	SS	df	MS	F	P-value	F crit			Still significant without DIW treatment
	1	1	1	3			Between Groups	26.03	3	8.67667	11.4796	1.69289e-06	2.69939
	2	2	3	0			Within Groups	72.56	96	0.755833
	1	1	2	3
	3	3	0	3			Total	98.59	99
	3	3	3	3
	3	3	1	3
	3	3	2	3			Mean Square Error:			Doesn't change relationships
	0	0	1	3			0.869387
	3	3	1	3			D.F:
	2	2	0	2			96
	3	3	1	3			Tukey's Q:
	2	2	1	3			3.7							0	0.015	0.03	0.1
	3	3	1	3			MSE/N(treatment)						0	-
	3	3	1	3			0.0347755						0.015	0.16	-
Mean	2.4	2.24	1.4	2.8			SQRT(MSE/N)						0.03	1	0.84	-
SD	0.8	0.861626	1.0583	0.632456			0.186482						0.1	0.4	0.56	1.4	-
St.Error	0.16	0.172325	0.21166	0.126491			Tukey's Yardstick (Q*SQRT(MSE/N)
							0.689983

## Sheet: Fluorescence ANOVA and Tukey
	Fluorescence Coverage
	DIW	0	0.015	0.03	0.1		Anova: Single Factor
	2	1	1	3	2
	2	2	2	2	2		SUMMARY
	0	2	2	1	2		Groups	Count	Sum	Average	Variance
	2	2	2	2	2		DIW	25	28	1.12	1.02667
	2	2	2	2	2		0	25	50	2	0.416667
	1	2	2	2	2		0.015	25	51	2.04	0.54
	3	2	2	0	2		0.03	23	40	1.73913	1.20158
	2	2	2	0	2		0.1	24	46	1.91667	0.166667
	1	3	3	2	2
	2	2	2	2	2
	0	2	2	0	2		ANOVA
	0	2	3	3	2		Source of Variation	SS	df	MS	F	P-value	F crit
	3	2	2	1	0		Between Groups	14.2384	4	3.55961	5.34846	0.000543777	2.4492
	1	2	2	3	2		Within Groups	77.8681	117	0.665539
	2	2	2	0	2
	0	2	2	2	2		Total	92.1066	121
	0	2	2	3	2
	0	2	2	3	2
	1	0	0	2	2
	1	2	2	3	2
	0	2	3	0	2
	0	2	1	2	2
	1	2	2	2	2
	2	4	4		2
	0	2	2
	Fluorescence Coverage Median Adde						Anova: Single Factor
	DIW	0	0.015	0.03	0.1
	2	1	1	3	2		SUMMARY
	2	2	2	2	2		Groups	Count	Sum	Average	Variance
	0	2	2	1	2		DIW	25	28	1.12	1.02667
	2	2	2	2	2		0	25	50	2	0.416667
	2	2	2	2	2		0.015	25	51	2.04	0.54
	1	2	2	2	2		0.03	25	44	1.76	1.10667
	3	2	2	0	2		0.1	25	48	1.92	0.16
	2	2	2	0	2
	1	3	3	2	2
	2	2	2	2	2		ANOVA
	0	2	2	0	2		Source of Variation	SS	df	MS	F	P-value	F crit
	0	2	3	3	2		Between Groups	14.272	4	3.568	5.48923	0.000430021	2.44724
	3	2	2	1	0		Within Groups	78	120	0.65
	1	2	2	3	2
	2	2	2	0	2		Total	92.272	124
	0	2	2	2	2
	0	2	2	3	2
	0	2	2	3	2
	1	0	0	2	2
	1	2	2	3	2
	0	2	3	0	2
	0	2	1	2	2
	1	2	2	2	2
	2	4	4	2	2
	0	2	2	2	2
	Fluorescence Coverage Median Added, 1=0						Anova: Single Factor
	DIW	0	0.015	0.03	0.1
	2	0	0	3	2		SUMMARY
	2	2	2	2	2		Groups	Count	Sum	Average	Variance
	0	2	2	0	2		DIW	25	22	0.88	1.27667
	2	2	2	2	2		0	25	49	1.96	0.54
	2	2	2	2	2		0.015	25	49	1.96	0.79
	0	2	2	2	2		0.03	25	42	1.68	1.31
	3	2	2	0	2		0.1	25	48	1.92	0.16
	2	2	2	0	2
	0	3	3	2	2
	2	2	2	2	2		ANOVA
	0	2	2	0	2		Source of Variation	SS	df	MS	F	P-value	F crit
	0	2	3	3	2		Between Groups	21.36	4	5.34	6.54947	8.40449e-05	2.44724
	3	2	2	0	0		Within Groups	97.84	120	0.815333
	0	2	2	3	2
	2	2	2	0	2		Total	119.2	124
	0	2	2	2	2
	0	2	2	3	2
	0	2	2	3	2		Mean Square Error:					DIW	0	0.015	0.03	0.1
	0	0	0	2	2		0.902958				DIW	-
	0	2	2	3	2		D.F:				0	1.08	-
	0	2	3	0	2		120				0.015	1.08	0	-
	0	2	0	2	2		Tukey's Q:				0.03	0.8	0.28	0.28	-
	0	2	2	2	2		3.92				0.1	1.04	0.04	0.04	0.24	-
	2	4	4	2	2		MSE/N(treatment)
	0	2	2	2	2		0.0361183
Mean	0.88	1.96	1.96	1.68	1.92		SQRT(MSE/N)
							0.190048
							Tukey's Yardstick (Q*SQRT(MSE/N)
							0.744989
Excluding DIW
	0	0.015	0.03	0.1		Anova: Single Factor
	0	0	3	2
	2	2	2	2		SUMMARY
	2	2	0	2		Groups	Count	Sum	Average	Variance
	2	2	2	2		0	25	49	1.96	0.54
	2	2	2	2		0.015	25	49	1.96	0.79
	2	2	2	2		0.03	25	42	1.68	1.31
	2	2	0	2		0.1	25	48	1.92	0.16
	2	2	0	2
	3	3	2	2
	2	2	2	2		ANOVA
	2	2	0	2		Source of Variation	SS	df	MS	F	P-value	F crit
	2	3	3	2		Between Groups	1.36	3	0.453333	0.647619	0.586341	2.69939		No significant difference found in amount of fluorescent coverage by PG%
	2	2	0	0		Within Groups	67.2	96	0.7					Possibly effect of symbiont shading?
	2	2	3	2
	2	2	0	2		Total	68.56	99
	2	2	2	2
	2	2	3	2
	2	2	3	2		Mean Square Error:
	0	0	2	2		6.78233
	2	2	3	2		D.F:
	2	3	0	2		96
	2	0	2	2		Tukey's Q:
	2	2	2	2		3.7
	4	4	2	2		MSE/N(treatment)
	2	2	2	2		0.271293
Mean	1.96	1.96	1.68	1.92		SQRT(MSE/N)
SD	0.72	0.870862	1.12143	0.391918		0.520858
						Tukey's Yardstick (Q*SQRT(MSE/N)
						1.92718

[truncated: 2 more sheets: Mortality ANOVA, Mortality vs Fluorescence Prese]
