# Supplementary material for: Challenges in using CellTracker Green on foraminifers that host algal endosymbionts
Source: PeerJ. 2018 Aug 30;6:e5304. doi: 10.7717/peerj.5304 (PMC6119597; doi:10.7717/peerj.5304)
Supplement: Supplemental Information 4 [file peerj-06-5304-s004.xlsx]

## Sheet: Recovery vs non brightness
Well Averages (From original data worksheets)
	Recovery							No Recovery
	0	0.015	0.03	0.08	0.1			DIW	0	0.015	0.03	0.08	0.1
	1.2	1.4	1.4	0.4				1	2.8	2.4	1.8		2.8
	2.2	1.6	1.8	1.33333				1.4	2.4	2	1.6		3
	2	2.6	1.6	0.8				0.6	1.8	1.8	1.2		2.4
	1.2	2.6	1	1.4				0.4	2.4	2.4	2		3
	1.2	1.6	1.6	0.25				0.6	2.6	2.6	0.8		2.75
Mean	1.56	1.96	1.48	0.836667			Mean		2.4	2.24	1.48		2.79
St. De	1.13066	0.915642	0.984683	0.731027					0.8	0.861626	1.0583		0.632456
St. Error	0.505648	0.409487	0.440363	0.326925				0	0.357771	0.385331	0.473286		0.282843
Setup for 2 Factor ANOVA using means instead of raw data
	72-hr Recovery time	No recovery time			Anova: Two-Factor With Replication															R10
0	1.2	2.8
	2.2	2.4			SUMMARY	72-hr Recovery time	No recovery time	Total
	2	1.8			0
	1.2	2.4			Count	5	5	10
	1.2	2.6			Sum	7.8	12	19.8
0.015	1.4	2.4			Average	1.56	2.4	1.98
	1.6	2			Variance	0.248	0.14	0.368444
	2.6	1.8
	2.6	2.4			0.015
	1.6	2.6			Count	5	5	10
0.03	1.4	1.8			Sum	9.8	11.2	21
	1.8	1.6			Average	1.96	2.24	2.1
	1.6	1.2			Variance	0.348	0.108	0.224444
	1	2
	1.6	0.8			0.03
8/10%	0.4	2.8			Count	5	5	10
	1.33333	3			Sum	7.4	7.4	14.8
	0.8	2.4			Average	1.48	1.48	1.48
	1.4	3			Variance	0.092	0.232	0.144
	0.25	2.75
Mean:	1.45917	2.2275			8/10%
					Count	5	5	10
					Sum	4.18333	13.95	18.1333
					Average	0.836667	2.79	1.81333
					Variance	0.275056	0.0605	1.209
					Total
					Count	20	20
					Sum	29.1833	44.55
					Average	1.45917	2.2275
					Variance	0.373523	0.351967
					ANOVA
					Source of Variation	SS	df	MS	F	P-value	F crit			Distributions ARE significantly different
					Sample	2.17467	3	0.724889	3.85693	0.0183529	2.90112		Interested in p-value of the columns, since difference caused by concentration is known from previous analysis
					Columns	5.90336	1	5.90336	31.4101	3.42116e-06	4.1491		No recovery time brighter on average
					Interaction	5.59542	3	1.86514	9.92388	8.89027e-05	2.90112
					Within	6.01422	32	0.187944
					Total	19.6877	39

## Sheet: Recovery vs non fl coverage
Well Averages (From original data worksheets)
	Recovery							No Recovery
	0	0.015	0.03	0.08	0.1			DIW	0	0.015	0.03	0.08	0.1
	0.4	0.8	0.4	0				1.6	1.6	1.6	1.8		2
	1.6	1.4	0.8	2.66667				1.4	2.2	2.2	1.2		2
	1	2.2	1.4	0.8				1	2	2.2	1.2		1.6
	0.4	2	0.8	0.4				0	1.6	1.6	2.66667		2
	1	1.2	0.8	0.75				0.4	2.4	2.2	1.8		2
Mean	0.88	1.52	0.84	0.923333	0			0.88	1.96	1.96	1.73333	0	1.92
SD	1.15516	1.16893	0.949947	1.15655	0				0.72	0.870862	1.12143	0	0.391918
St.Error	0.516604	0.522762	0.424829	0.517223					0.321994	0.389461	0.501518		0.175271
	72-hr Recovery time	No recovery time		Anova: Two-Factor With Replication
0	0.4	1.6
	1.6	2.2		SUMMARY	72-hr Recovery time	No recovery time	Total
	1	2		0
	0.4	1.6		Count	5	5	10
	1	2.4		Sum	4.4	9.8	14.2
0.015	0.8	1.6		Average	0.88	1.96	1.42
	1.4	2.2		Variance	0.252	0.128	0.492889
	2.2	2.2
	2	1.6		0.015
	1.2	2.2		Count	5	5	10
0.03	0.4	1.8		Sum	7.6	9.8	17.4
	0.8	1.2		Average	1.52	1.96	1.74
	1.4	1.2		Variance	0.332	0.108	0.249333
	0.8	2.66667
	0.8	1.8		0.03
8/10%	0	2		Count	5	5	10
	2.66667	2		Sum	4.2	8.66667	12.8667
	0.8	1.6		Average	0.84	1.73333	1.28667
	0.4	2		Variance	0.128	0.362222	0.439556
	0.75	2
Mean:	1.04083	1.89333		8/10%
				Count	5	5	10
				Sum	4.61667	9.6	14.2167
				Average	0.923333	1.92	1.42167
				Variance	1.05272	0.032	0.758028
				Total
				Count	20	20
				Sum	20.8167	37.8667
				Average	1.04083	1.89333
				Variance	0.452996	0.141942
				ANOVA
				Source of Variation	SS	df	MS	F	P-value	F crit				There is a significant difference between no recovery and recovery
				Sample	1.11313	3	0.371044	1.23942	0.311619	2.90112		No recovery time shows higher coverage on average
				Columns	7.26756	1	7.26756	24.2763	2.45587e-05	4.1491		Possibly because whatever is making it less bright makes it harder to tell
				Interaction	0.61091	3	0.203637	0.680221	0.570625	2.90112
				Within	9.57978	32	0.299368
				Total	18.5714	39

## Sheet: control vs dark
Comparison of coverage between Control Sample from Propylene Glycol experiment and Light Incubated sample from dark experiment
	Darkness Treatment	Control
	3	0		t-Test: Two-Sample Assuming Unequal Variances
	4	2
	3	2			Variable 1	Variable 2
	0	2		Mean	3	1.96
	4	2		Variance	0.608696	0.54
	3	2		Observations	24	25
	3	2		Hypothesized Mean Difference	0
	3	2		df	47
	2	3		t Stat	4.79909
	3	2		P(T<=t) one-tail	8.26835e-06
	3	2		t Critical one-tail	1.67793
	3	2		P(T<=t) two-tail	1.65367e-05
	3	2		t Critical two-tail	2.01174
	4	2
	3	2
	3	2		More surface area fluoresces in Darkness treatment than control- because symbionts digested/concentrated?
	3	2
	3	2
	3	0
	4	2
	3	2
	3	2
	3	2
	3	4
		2
Mean	3	1.96
comparison of brightness
	Dark	Control		t-Test: Two-Sample Assuming Unequal Variances
	2	3
	2	2			Variable 1	Variable 2
	3	3		Mean	2	2.4
	0	3		Variance	0.608696	0.666667
	1	3		Observations	24	25
	3	3		Hypothesized Mean Difference	0
	2	2		df	47
	3	2		t Stat	-1.75363
	3	3		P(T<=t) one-tail	0.043007			If one tailed, control is slightly brighter
	3	2		t Critical one-tail	1.67793			Confused by issue of symbiont shading
	2	2		P(T<=t) two-tail	0.0860139
	2	1		t Critical two-tail	2.01174
	2	2
	2	1
	2	3
	1	3
	2	3
	2	3
	2	0
	3	3
	2	2
	1	3
	1	2
	2	3
		3
mean	2	2.4

## Sheet: control vs dark ave of ave
Brightness							t-Test: Two-Sample Assuming Unequal Variances										t-Test: Two-Sample Assuming Unequal Variances
							Control vs Dark
	Control no recov	Dark	Light					Variable 1	Variable 2		Control significantly brighter than darkness treatment							Variable 1	Variable 2
	2.8	1.4	1.6				Mean	2.4	1.27								Mean	2.4	2.03
	2.4	1	2.75				Variance	0.14	0.0995			t-Test: Two-Sample Assuming Unequal Variances					Variance	0.14	0.2095
	1.8	1	2.2				Observations	5	5			Control vs light incubation					Observations	5	5
	2.4	1.2	1.8				Hypothesized Mean Difference	0					Variable 1	Variable 2			Hypothesized Mean Difference	0
	2.6	1.75	1.8				df	8				Mean	2.4	2.03			df	8
							t Stat	5.1631				Variance	0.14	0.2095			t Stat	1.39947
							P(T<=t) one-tail	0.00043019				Observations	5	5			P(T<=t) one-tail	0.0996164
							t Critical one-tail	1.85955				Hypothesized Mean Difference	0				t Critical one-tail	1.85955
							P(T<=t) two-tail	0.00086038				df	8				P(T<=t) two-tail	0.199233
							t Critical two-tail	2.306				t Stat	1.39947				t Critical two-tail	2.306
												P(T<=t) one-tail	0.0996164
												t Critical one-tail	1.85955				Control not brighter than light incubation
												P(T<=t) two-tail	0.199233
												t Critical two-tail	2.306
Coverage
	Control no recov	Dark	Light			t-Test: Two-Sample Assuming Unequal Variances
	1.6	3.4	2.8			Control vs dark incubation
	2.2	1.8	2.75				Variable 1	Variable 2		No significant difference in coverage unless one tailed
	2	2	3.2			Mean	1.96	2.73
	1.6	3.2	3			Variance	0.128	0.5845
	2.4	3.25	3.2			Observations	5	5
Mean	1.96	2.73	2.99			Hypothesized Mean Difference	0
						df	6
						t Stat	-2.03978
						P(T<=t) one-tail	0.0437355
						t Critical one-tail	1.94318
						P(T<=t) two-tail	0.0874711
						t Critical two-tail	2.44691
						t-Test: Two-Sample Assuming Unequal Variances
							Variable 1	Variable 2
						Mean	1.96	2.99
						Variance	0.128	0.0455
						Observations	5	5
						Hypothesized Mean Difference	0
						df	7
						t Stat	-5.52933
						P(T<=t) one-tail	0.000439428
						t Critical one-tail	1.89458
						P(T<=t) two-tail	0.000878857
						t Critical two-tail	2.36462

## Sheet: Combined- Mortality comparison
													Mean errors:
													Visually determined: no recovery	4.89898	8	0	0
													Fluorescence: No recovery	4	4.89898	7.48331	4
													Visually determined: 72 hour recovery	4	4	14.6969	10.7703
													Fluorescence: 72 hour recovery	8	11.6619	10.198	17
															#VALUE!
